# Supplementary material for: Targeting mitochondrial biogenesis to overcome drug resistance to MAPK inhibitors
Source: JCI journal article supplement (doi:10.1172/jci82661), 2016-04-03
Supplement: sd1 [file 1]

## **Supplemental data**

Supplemental data include extended experimental procedures, 7 supplemental figures and 9 supplemental tables.

|

| Rank | Gene Set                                         | NES  | NOM p-val | FDR q-val |
|------|--------------------------------------------------|------|-----------|-----------|
| 1    | MEK TARGETS PNAS JOSEPH                          | 3.04 | 0         | 0         |
| 2    | BRAF TARGETS PNAS JOSEPH                         | 3    | 0         | 0         |
| 3    | KEGG LYSOSOME                                    | 2.81 | 0         | 0         |
| 4    | MEK TARGETS PRATILAS PNAS2009                    | 2.59 | 0         | 0         |
| 5    | KEGG ECM RECEPTOR INTERACTION                    | 2.21 | 0         | 0         |
| 6    | KEGG AMINO SUGAR AND NUCLEOTIDE SUGAR METABOLISM | 2.19 | 0         | 0.001     |
| 7    | KEGG VIBRIO CHOLERAE INFECTION                   | 2.05 | 0         | 0.005     |
| 8    | KEGG GLYCOSAMINOGLYCAN DEGRADATION               | 1.91 | 0.002     | 0.017     |
| 9    | KEGG MELANOGENESIS                               | 1.88 | 0         | 0.022     |
| 10   | KEGG TYROSINE METABOLISM                         | 1.87 | 0         | 0.020     |

**Supplemental Figure 1. Related to Figure 1.** The Top 10 ranked pathways associated with the “melanoma” phenotype. CCLE melanoma cell lines were compared to CCLE non-melanoma cell lines followed by GSEA.

**A****Malme-3M**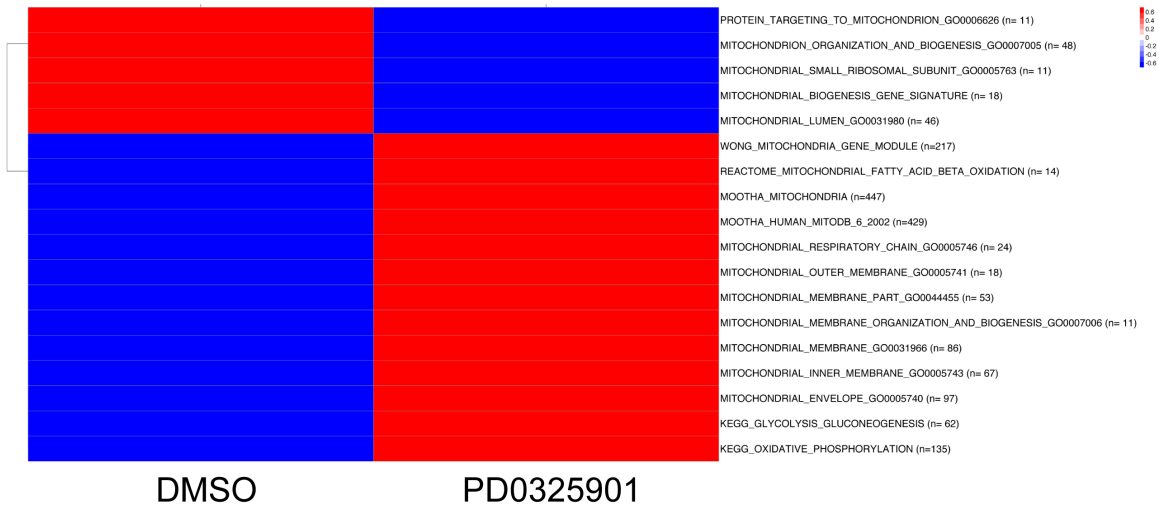**B****COLO829**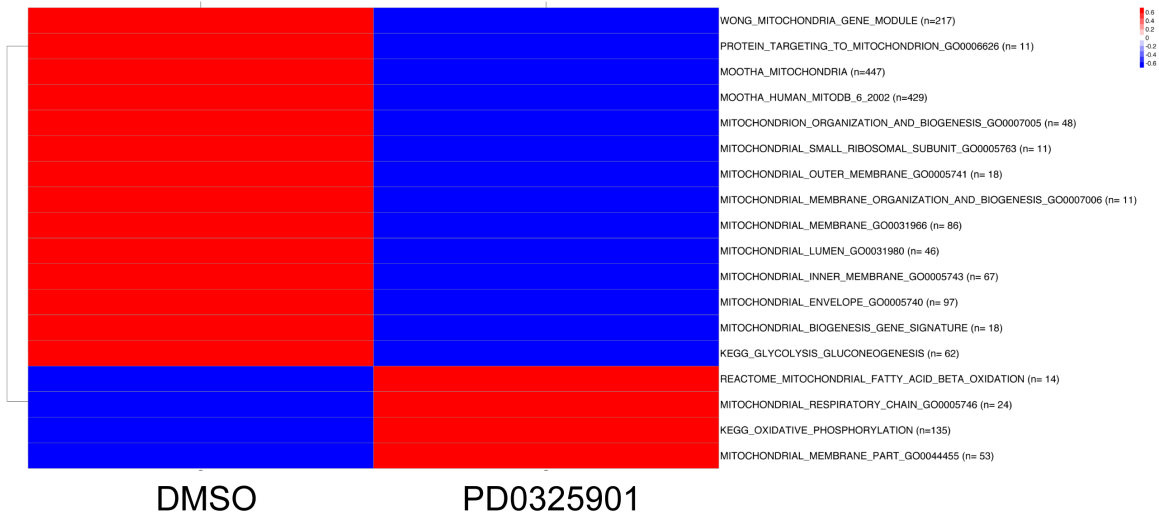

**Supplemental Figure 2. Related to Figure 3. (A and B)** The heat maps of enrichment scores of 20 gene sets in Malme-3M cells (**A**) and COLO829 cells (**B**) treated with the control and PD0325901.

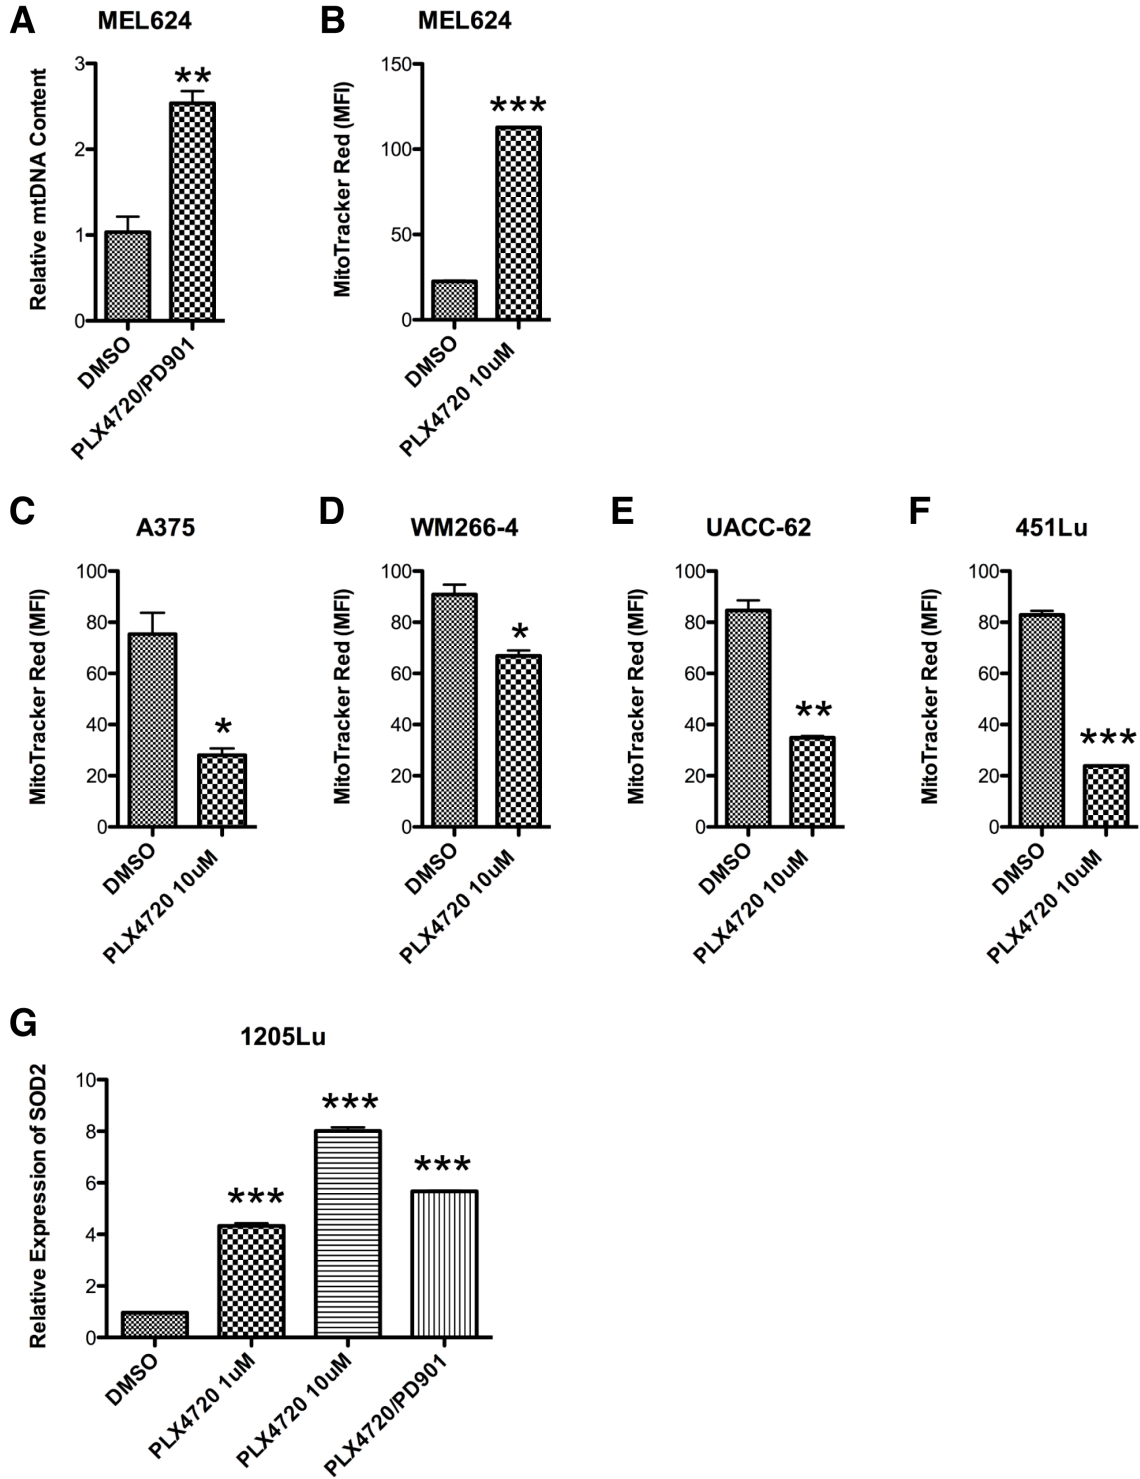

**Supplemental Figure 3. Related to Figure 5.** (A) Relative mitochondrial DNA copy number in MEL624 melanoma cells treated for 72 h with DMSO or indicated MAPK inhibitors. Technical replicates (n=3) for each condition were included. Data represented 2 independent experiments. (B-F) The MFI of MitoTracker Red in MEL624 (B), A375 (C), WM266-4 (D), UACC-62 (E) and 451Lu (F) treated for 72 h with DMSO or PLX4720 at 10  $\mu$ M. 2 biological replicates for

each condition were included. Data represented 2 independent experiments. **(G)** Relative gene expression of *SOD2* determined by qRT-PCR in 1205Lu melanoma cells treated for 72 h with DMSO or indicated MAPK inhibitors. 3 technical replicates for each condition were included. Data represent 2 independent experiments. **(A-G)** An unpaired two-tailed t-test was used.

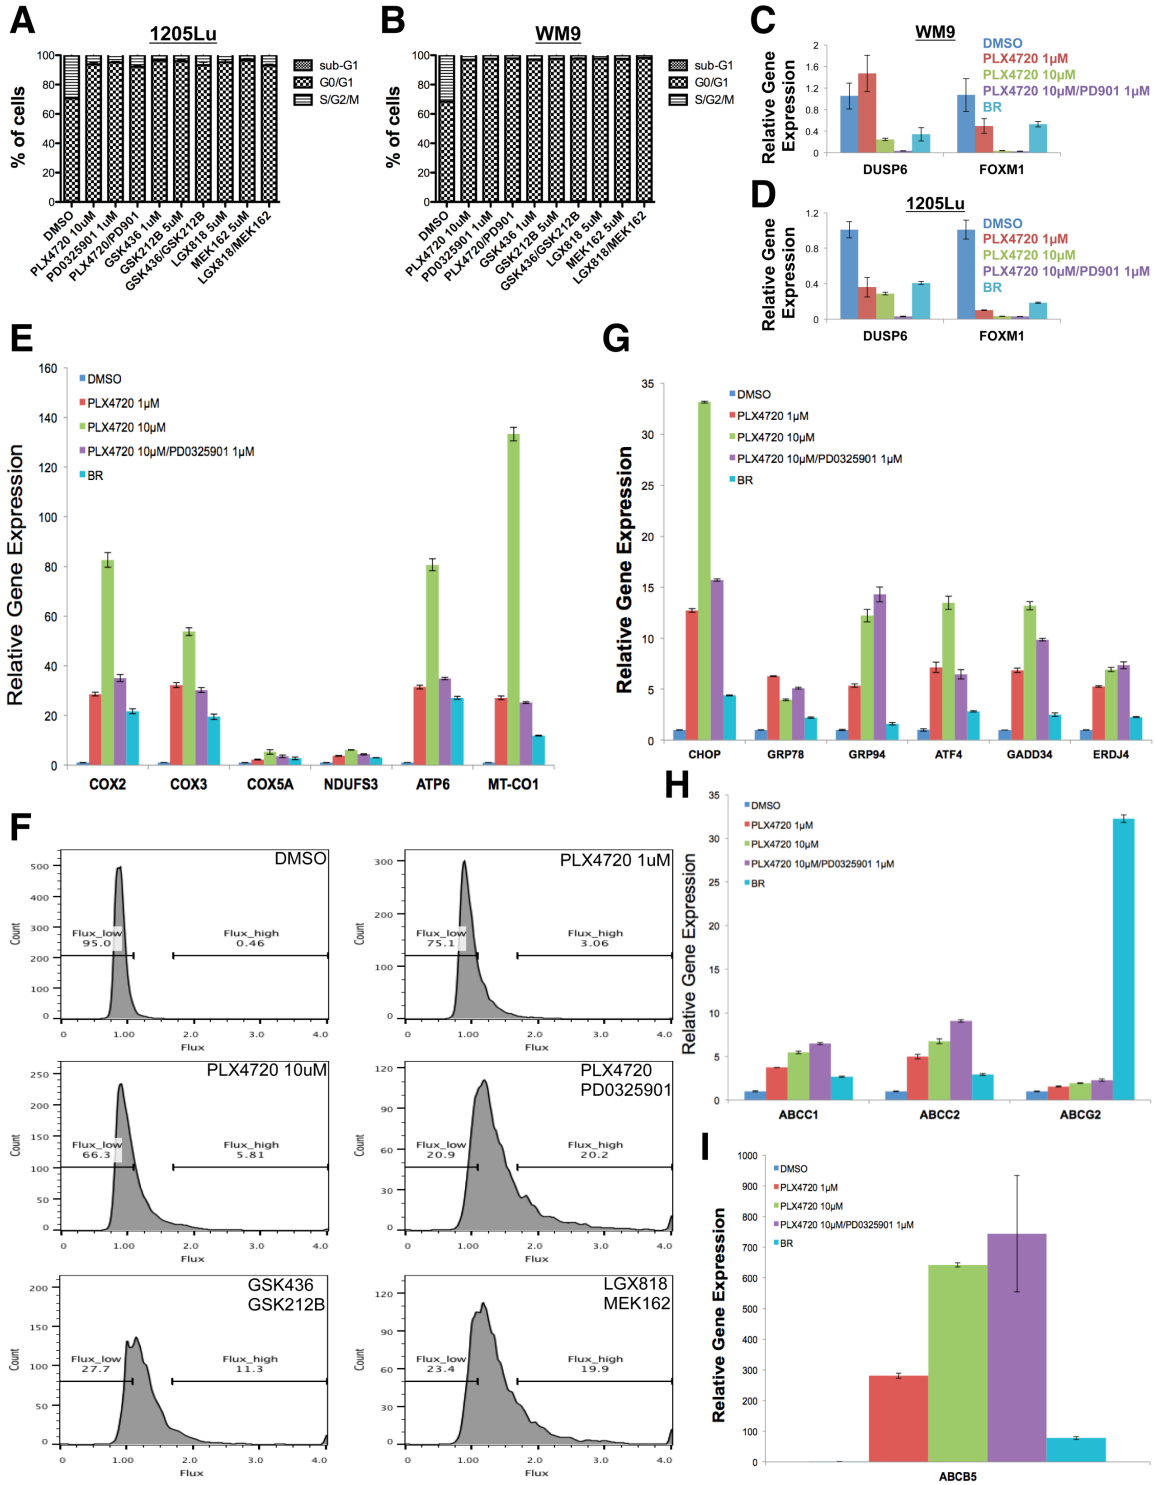

**Supplemental Figure 4. Related to Figure 6.** (A and B) Percentages of sub-G<sub>1</sub>, G<sub>0</sub>/G<sub>1</sub> and S/G<sub>2</sub>/M phase of the cell cycle were assessed by the Propidium Iodide Staining Cell Cycle FACS assay conducted in 1205Lu (A) and WM9 (B) cells that were treated with DMSO or indicated MAPK inhibitors for 3 days. (C and D) Relative gene expression of *FOXM1* and *DUSP6* assessed by qRT-PCR in WM9 (C) and 1205Lu (D) melanoma cells treated for 72 h with DMSO or

indicated MAPK inhibitors. BRAF inhibitor resistant cells (BR) were included as the control. **(E)** Relative gene expression of 6 representative mitochondrial respiratory chain subunits assessed by qRT-PCR in WM9 cells that were treated for 72 h with DMSO or indicated inhibitors. BRAF inhibitor resistant cells (BR) are included as the control. **(F)** The autophagic flux assessed by FACS analysis in WM9 cells expressing the mCherry-eGFP-LC3B construct treated for 72 h with DMSO or indicated MAPK inhibitors. Data represented the average of 2 biological replicates. **(G-I)** Relative gene expression of ER stress response genes **(G)** and ABC transporter genes **(H and I)** assessed by qRT-PCR in WM9 cells that were included in **(E)**. **(C, D, E, G, H and I)** 3 technical replicates for each condition are included. Data represented 2 independent experiments.

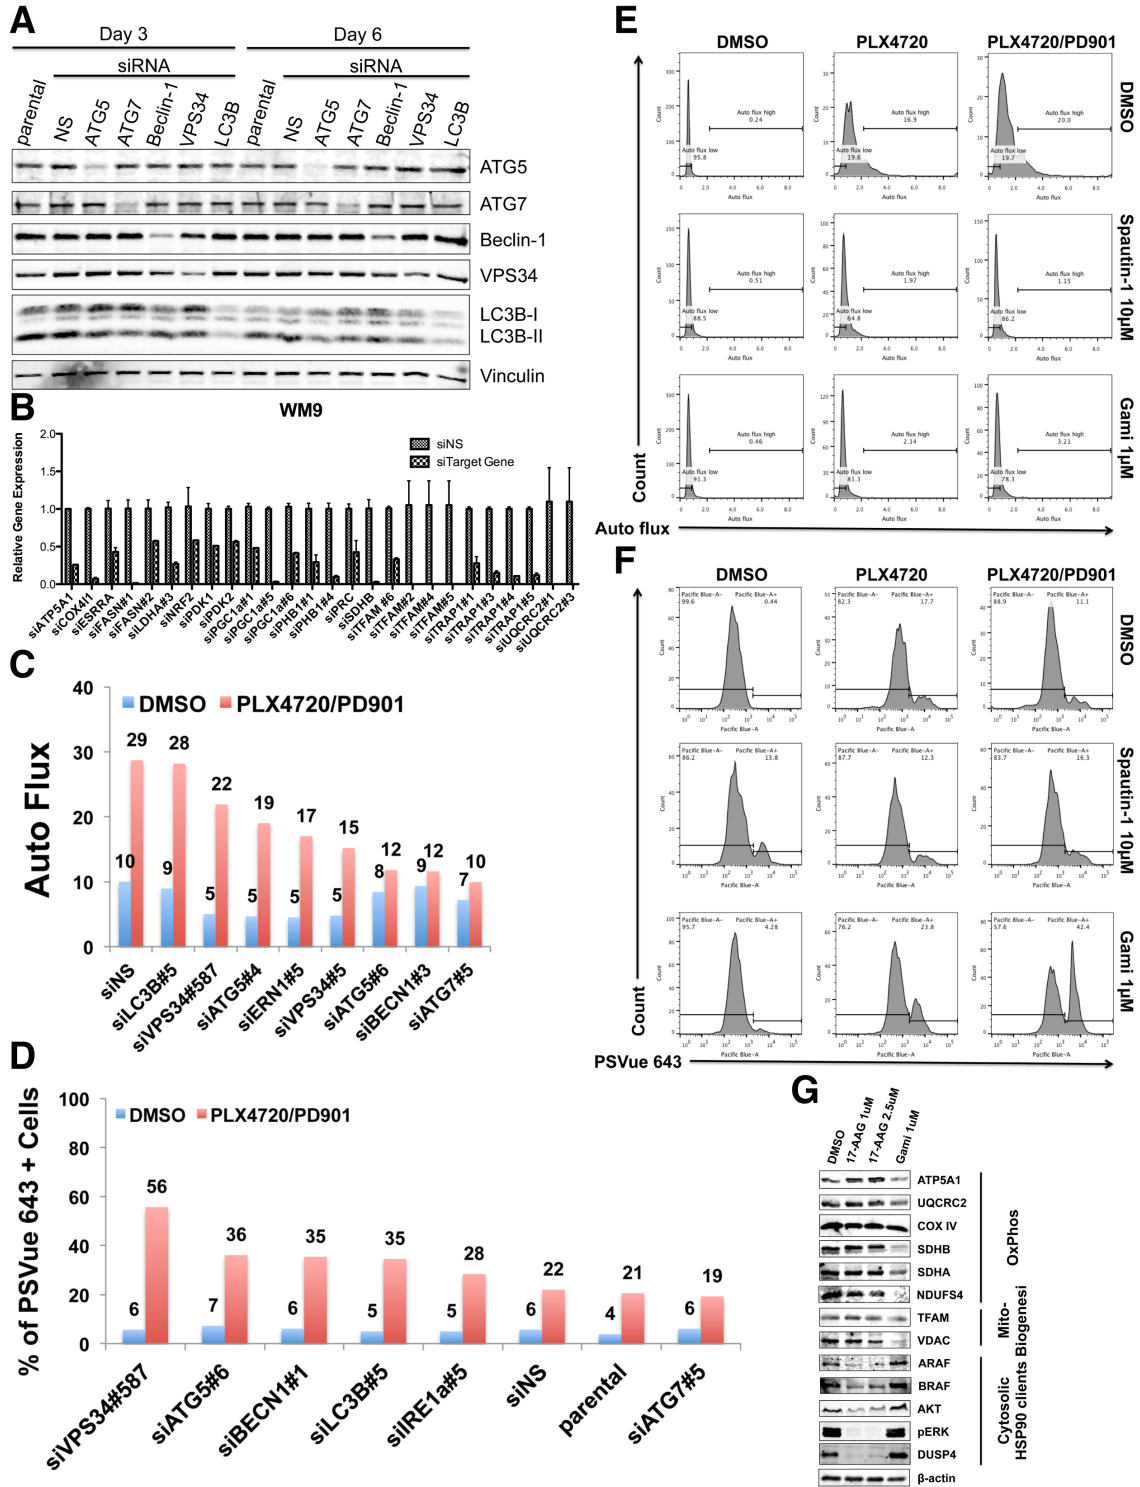

**Supplemental Figure 5. Related to Figure 8.** (A) Immunoblotting of autophagy proteins in WM9 cells transfected with siATG5, siATG7, siBeclin-1, siVPS34 or siLC3B at 20 nM for 3 and 6 days. Parental cells and cells transfected with siNS are included as controls. (B) Relative gene expression of MitoB, glycolysis and OxPhos genes assessed by qRT-PCR in WM9 cells transfected with siRNAs targeting MitoB, glycolysis and OxPhos genes at 20 nM for 3 days. 2



technical replicates for each condition were included. Data represented 2 independent experiments. (C) The autophagic flux assessed by FACS analysis of WM9 cells expressing the mCherry-eGFP-LC3B construct that were transfected with the indicated siRNAs targeting autophagy and ER stress response and treated for 72 h with DMSO or MAPK inhibitors. The average of 2 biological replicates was plotted and data represented 2 independent experiments. (D) The percentage of PSVue 643 positive WM9 cells expressing the mCherry-eGFP-LC3B construct transfected with the indicated siRNAs targeting autophagy and ER stress response and then treated for 72 h with DMSO or indicated MAPK inhibitors. The average of 2 biological replicates was plotted and data represented 2 independent experiments. (E and F) The autophagic flux (E) and the percentage of PSVue 643 positive (F) WM9 cells expressing the mCherry-eGFP-LC3B construct that were treated for 72 h with Gamitrinib at 1  $\mu$ M or Spautin-1 at 10  $\mu$ M in combination with indicated MAPK inhibitors. Cells treated with DMSO were used as the control for the set-up of the gating. Data represented 2 biological replicates. (G) Immunoblotting of proteins related to OxPhos, MitoB and cytosolic Hsp90 clients in WM9 cells treated with DMSO, 17-AAG or Gamitrinib for 2 days.

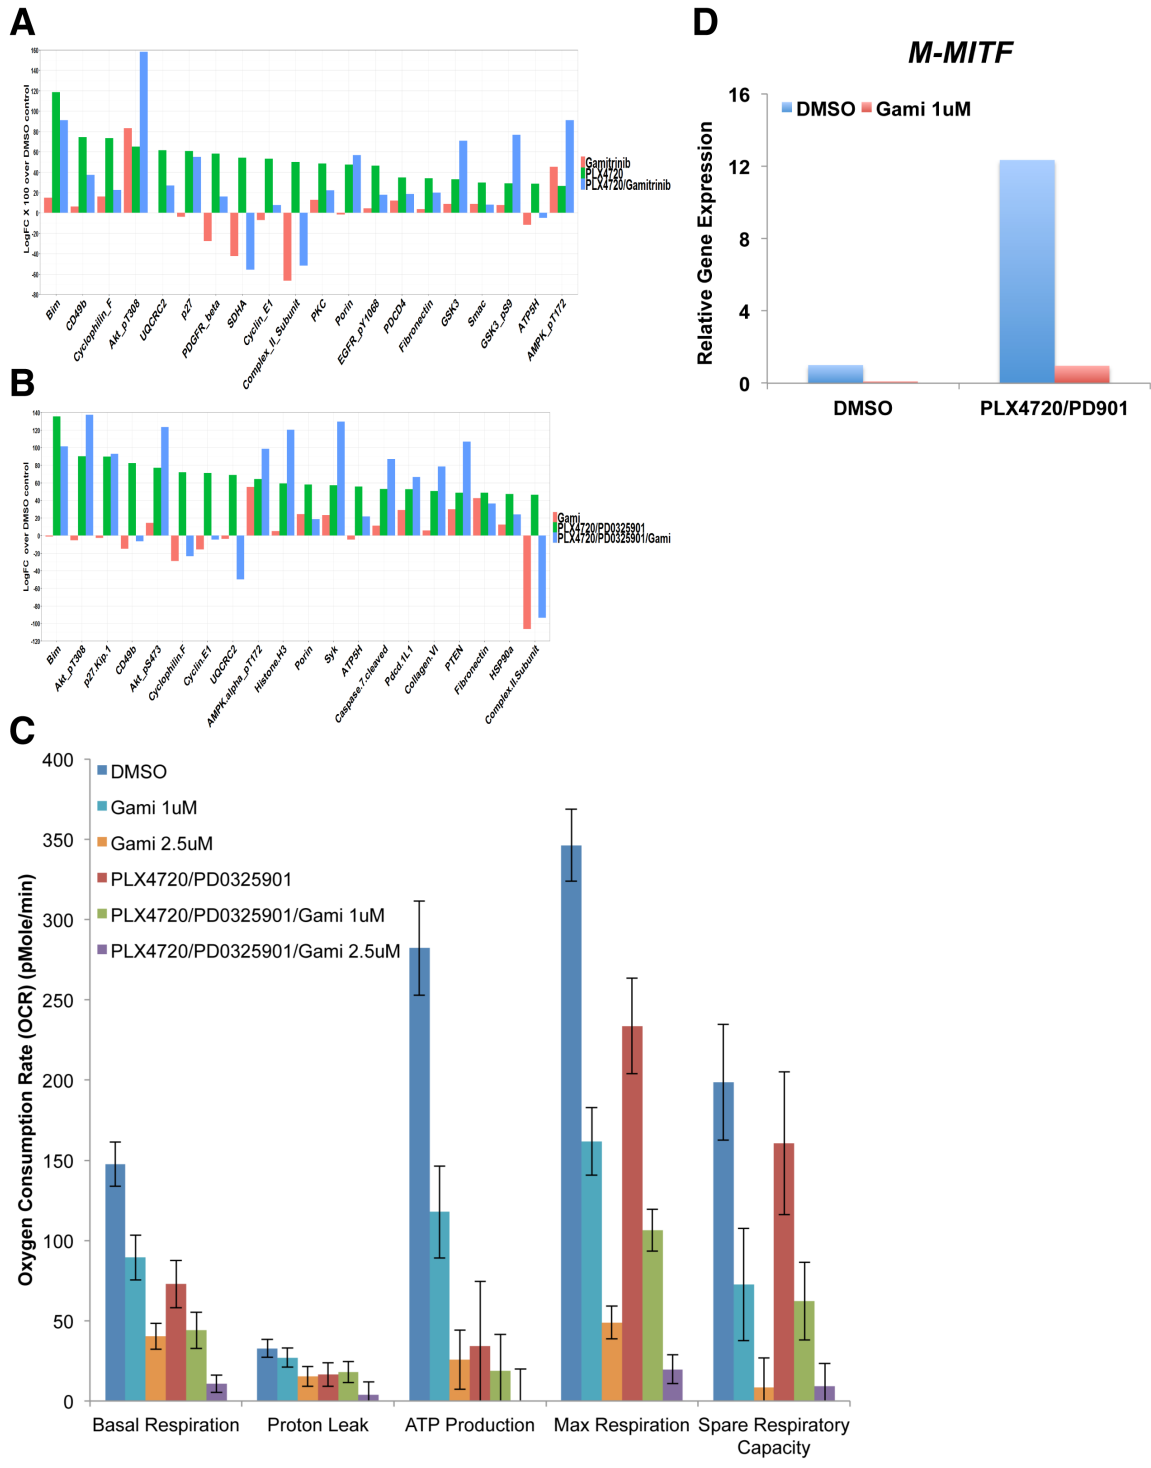

**Supplemental Figure 6. Related to Figure 10.** (A and B) Relative expression of 20 proteins assessed by RPPA in WM9 melanoma cells that were most significantly up-regulated by the treatment with PLX4720 at 10  $\mu$ M (A) or the combination of PLX4720 at 10  $\mu$ M and PD0325901 at 1  $\mu$ M for 72 h. WM9 cells were also treated with Gamitrinib at 1  $\mu$ M, and the combination PLX4720 and Gamitrinib. WM9 cells treated with DMSO were used as the control. Data represented the average of 3 biological replicates. (C) Quantification of five parameters of

oxygen consumption rates of samples included in Figure 10E. **(D)** Relative gene expression of *M-MITF* assessed by qRT-PCR in WM9 cells treated for 48 h with DMSO or the combination of PLX4720 at 10  $\mu$ M and PD0325901 at 1  $\mu$ M, with or without the addition of Gamitrinib at 1  $\mu$ M. Data represented 2 independent experiments.

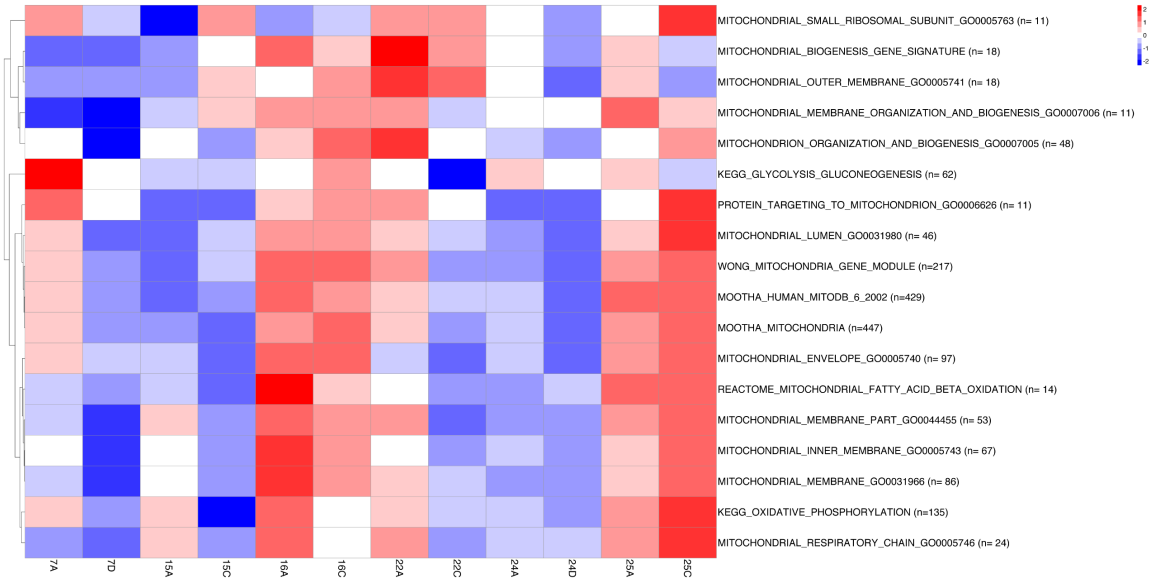

**Supplemental Figure 7. Related to Figure 12.** The heatmap of enrichment scores of 20 gene sets in paired pre- and post-treatment tumor biopsies that are included in EGAS00001000992.

**Supplemental Table 1. The List of 5 Additional MitoB Genes (Related to Figure 1 and Table 1)**

| Category                             | Symbol       | Synonyms                                                |
|--------------------------------------|--------------|---------------------------------------------------------|
| Mitochondrial Outer Membrane Channel | <i>VDAC1</i> | <i>Outer mitochondrial membrane protein porin 1</i>     |
| Mitochondrial Protein Import         | <i>HSP60</i> | <i>60 kDa heat shock protein, mitochondrial</i>         |
| Mitochondria Protein Folding         | <i>TRAP1</i> | <i>TNF receptor-associated protein 1, mitochondrial</i> |
| Mitochondria Protein Translation     | <i>TUFM</i>  | <i>Tu translation elongation factor, mitochondrial</i>  |
| Antioxidant                          | <i>SOD2</i>  | <i>Superoxide dismutase 2, mitochondrial</i>            |

**Supplemental Table 2. The List of Significantly Enriched Gene Sets (Related to Figure 4)**

| Up-regulated |                                                             | 12h                                          | 24h                                                         | 48h                                                         | 60h                                     | 72h                                                         | 96h                                                         |
|--------------|-------------------------------------------------------------|----------------------------------------------|-------------------------------------------------------------|-------------------------------------------------------------|-----------------------------------------|-------------------------------------------------------------|-------------------------------------------------------------|
| Rank         |                                                             |                                              |                                                             |                                                             |                                         |                                                             |                                                             |
| 1            | STERIOD_BIOSYNTHESIS                                        | OXIDATIVE_PHOSPHORYLATION                    | LYSOSOME                                                    | OXIDATIVE_PHOSPHORYLATION                                   | OXIDATIVE_PHOSPHORYLATION               | OXIDATIVE_PHOSPHORYLATION                                   | OXIDATIVE_PHOSPHORYLATION                                   |
| 2            | JAK_STAT_SIGNALING_PATHWAY                                  | METABOLISM_OF_XENOBIOTICS_BY_CYTOCHROME_P450 | LYSOSOME                                                    | LYSOSOME                                                    | LYSOSOME                                | LYSOSOME                                                    | LYSOSOME                                                    |
| 3            | GLYCOSAMINOGLYCAN_DEGRADATION                               | LYSOSOME                                     | LYSOSOME                                                    | LYSOSOME                                                    | LYSOSOME                                | LYSOSOME                                                    | LYSOSOME                                                    |
| 4            | CELL_ADHESION_MOLECULES_CAMS                                | PARKINSONS_DISEASE                           | AUTODIAPYCNOSIS                                             | PARKINSONS_DISEASE                                          | PARKINSONS_DISEASE                      | PARKINSONS_DISEASE                                          | PARKINSONS_DISEASE                                          |
| 5            | ECM_RECEPTOR_INTERACTION                                    | DRUG_METABOLISM_CYTOCHROME_P450              | PARKINSONS_DISEASE                                          | PARKINSONS_DISEASE                                          | PARKINSONS_DISEASE                      | PARKINSONS_DISEASE                                          | PARKINSONS_DISEASE                                          |
| 6            | INTESTINAL_IMMUNE_NETWORK_FOR_IGA_PRODUCING_CELL_ACTIVATION | HUNTINGTONS_DISEASE                          | ALZHEIMERS_DISEASE                                          | ALZHEIMERS_DISEASE                                          | ALZHEIMERS_DISEASE                      | ALZHEIMERS_DISEASE                                          | ALZHEIMERS_DISEASE                                          |
| 7            | SMALL_CELL_LUNG_CANCER                                      | ALZHEIMERS_DISEASE                           | ALZHEIMERS_DISEASE                                          | ALZHEIMERS_DISEASE                                          | ALZHEIMERS_DISEASE                      | ALZHEIMERS_DISEASE                                          | ALZHEIMERS_DISEASE                                          |
| 8            | COMPLEMENT_AND_COAGULATION_CASCADES                         | CITRATE_CYCLE_TCA_CYCLE                      | ABC_TRANSPORTERS                                            | ANTIGEN_PROCESSING_AND_PRESENTATION                         | ANTIGEN_PROCESSING_AND_PRESENTATION     | ANTIGEN_PROCESSING_AND_PRESENTATION                         | ANTIGEN_PROCESSING_AND_PRESENTATION                         |
| 9            | PPAR_SIGNALING_PATHWAY                                      | PORPHYRIN_AND_CHLOROPHYLL_METABOLISM         | ALLOGRAFT_REJECTION                                         | GLYCOSYLPHOSPHATIDYLINOSITOL_GPI_ANCHOR                     | GLYCOSYLPHOSPHATIDYLINOSITOL_GPI_ANCHOR | GLYCOSYLPHOSPHATIDYLINOSITOL_GPI_ANCHOR                     | GLYCOSYLPHOSPHATIDYLINOSITOL_GPI_ANCHOR                     |
| 10           | GLYCOSAMINOGLYCAN_BIOSYNTHESIS_HEPARAN                      | STERIOD_HORMONE_BIOSYNTHESIS                 | HUNTINGTONS_DISEASE                                         | PORPHYRIN_AND_CHLOROPHYLL_METABOLISM                        | PORPHYRIN_AND_CHLOROPHYLL_METABOLISM    | PORPHYRIN_AND_CHLOROPHYLL_METABOLISM                        | PORPHYRIN_AND_CHLOROPHYLL_METABOLISM                        |
| 11           | ALLOGRAFT_REJECTION                                         | PROLIFERATION                                | TYPE_II_DIABETES_MELLITUS                                   | TYPE_II_DIABETES_MELLITUS                                   | TYPE_II_DIABETES_MELLITUS               | TYPE_II_DIABETES_MELLITUS                                   | TYPE_II_DIABETES_MELLITUS                                   |
| 12           | VIRAL_MYOCARDITIS                                           | ABC_TRANSPORTERS                             | ANTIGEN_PROCESSING_AND_PRESENTATION                         | ANTIGEN_PROCESSING_AND_PRESENTATION                         | ANTIGEN_PROCESSING_AND_PRESENTATION     | ANTIGEN_PROCESSING_AND_PRESENTATION                         | ANTIGEN_PROCESSING_AND_PRESENTATION                         |
| 13           | FOCAL_ADHESION                                              | VALINE_LEUCINE_AND_ISOLEUCINE_DEGRADATION    | INTESTINAL_IMMUNE_NETWORK_FOR_IGA_PRODUCING_CELL_ACTIVATION | ALLOGRAFT_REJECTION                                         | ALLOGRAFT_REJECTION                     | ALLOGRAFT_REJECTION                                         | ALLOGRAFT_REJECTION                                         |
| 14           | AUTODIAPYCNOSIS                                             | CALCIUM_SIGNALING_PATHWAY                    | VALINE_LEUCINE_AND_ISOLEUCINE_DEGRADATION                   | CITRATE_CYCLE_TCA_CYCLE                                     | CITRATE_CYCLE_TCA_CYCLE                 | CITRATE_CYCLE_TCA_CYCLE                                     | CITRATE_CYCLE_TCA_CYCLE                                     |
| 15           | BLADDER_CANCER                                              | GLUTATHIONE_METABOLISM                       | STARCH_AND_SUCROSE_METABOLISM                               | GLYCOSAMINOGLYCAN_DEGRADATION                               | GLYCOSYLPHOSPHATIDYLINOSITOL_GPI_ANCHOR | GLYCOSYLPHOSPHATIDYLINOSITOL_GPI_ANCHOR                     | GLYCOSYLPHOSPHATIDYLINOSITOL_GPI_ANCHOR                     |
| 16           | BIOSYNTHESIS_OF_UNSATURATED_FATTY_ACIDS                     | GLYCOSAMINOGLYCAN_DEGRADATION                | PORPHYRIN_AND_CHLOROPHYLL_METABOLISM                        | DRUG_METABOLISM_CYTOCHROME_P450                             | APOPTOSIS                               | GLYCOSYLPHOSPHATIDYLINOSITOL_GPI_ANCHOR                     | GLYCOSYLPHOSPHATIDYLINOSITOL_GPI_ANCHOR                     |
| 17           | THYROID_CANCER                                              | GRAFT_VERSUS_HOST_DISEASE                    | CITRATE_CYCLE_TCA_CYCLE                                     | INTESTINAL_IMMUNE_NETWORK_FOR_IGA_PRODUCING_CELL_ACTIVATION | STARCH_AND_SUCROSE_METABOLISM           | HEMATOPOIETIC_CELL_LINEAGE                                  | HEMATOPOIETIC_CELL_LINEAGE                                  |
| 18           | LEISHMANIA_INFECTION                                        | TYPE_II_DIABETES_MELLITUS                    | ALDOSTERONE_REGULATED_SODIUM_REABSORPTION                   | VIRAL_MYOCARDITIS                                           | ANTIGEN_PROCESSING_AND_PRESENTATION     | INTESTINAL_IMMUNE_NETWORK_FOR_IGA_PRODUCING_CELL_ACTIVATION | INTESTINAL_IMMUNE_NETWORK_FOR_IGA_PRODUCING_CELL_ACTIVATION |
| 19           | NON_SMALL_CELL_LUNG_CANCER                                  | PENTOSE_PHOSPHATE_PATHWAY                    | HEMATOPOIETIC_CELL_LINEAGE                                  | CARDIAC_MUSCLE_CONTRACTION                                  | CARDIAC_MUSCLE_CONTRACTION              | CARDIAC_MUSCLE_CONTRACTION                                  | CARDIAC_MUSCLE_CONTRACTION                                  |
| 20           | MELANOMA                                                    | ADIPOCYTOKINE_SIGNALING_PATHWAY              | ALANINE_ASPARTATE_AND_GLUTAMATE_METABOLISM                  | STARCH_AND_SUCROSE_METABOLISM                               | VIRAL_MYOCARDITIS                       | NOTCH_SIGNALING_PATHWAY                                     | NOTCH_SIGNALING_PATHWAY                                     |

  

| Down-regulated |                                                             | 12h                                    | 24h                                    | 48h                                     | 60h                                    | 72h                                    | 96h                                    |
|----------------|-------------------------------------------------------------|----------------------------------------|----------------------------------------|-----------------------------------------|----------------------------------------|----------------------------------------|----------------------------------------|
| Rank           |                                                             |                                        |                                        |                                         |                                        |                                        |                                        |
| 1              | MEK_TARGETS_PNAS_JOSEPH                                     | MEK_TARGETS_PNAS_JOSEPH                | MEK_TARGETS_PNAS_JOSEPH                | MEK_TARGETS_PNAS_JOSEPH                 | MEK_TARGETS_PNAS_JOSEPH                | MEK_TARGETS_PNAS_JOSEPH                | MEK_TARGETS_PNAS_JOSEPH                |
| 2              | BRAF_TARGETS_PNAS_JOSEPH                                    | BRAF_TARGETS_PNAS_JOSEPH               | BRAF_TARGETS_PNAS_JOSEPH               | BRAF_TARGETS_PNAS_JOSEPH                | BRAF_TARGETS_PNAS_JOSEPH               | BRAF_TARGETS_PNAS_JOSEPH               | BRAF_TARGETS_PNAS_JOSEPH               |
| 3              | MEK_TARGETS_PNAS2009                                        | CELL_CYCLE                             | CELL_CYCLE                             | CELL_CYCLE                              | CELL_CYCLE                             | CELL_CYCLE                             | CELL_CYCLE                             |
| 4              | STERIOD_BIOSYNTHESIS                                        | MEK_TARGETS_PNAS2009                   | BRAF_TARGETS_PNAS_JOSEPH               | BRAF_TARGETS_PNAS_JOSEPH                | BRAF_TARGETS_PNAS2009                  | BRAF_TARGETS_PNAS2009                  | BRAF_TARGETS_PNAS2009                  |
| 5              | JAK_STAT_SIGNALING_PATHWAY                                  | DNA_REPLICATION                        | DNA_REPLICATION                        | DNA_REPLICATION                         | DNA_REPLICATION                        | DNA_REPLICATION                        | DNA_REPLICATION                        |
| 6              | CELL_ADHESION_MOLECULES_CAMS                                | OCYTE_MEIOSIS                          | DNA_REPLICATION                        | DNA_REPLICATION                         | DNA_REPLICATION                        | DNA_REPLICATION                        | DNA_REPLICATION                        |
| 7              | GLYCOSAMINOGLYCAN_DEGRADATION                               | MISMATCH_REPAIR                        | MISMATCH_REPAIR                        | MISMATCH_REPAIR                         | MISMATCH_REPAIR                        | MISMATCH_REPAIR                        | MISMATCH_REPAIR                        |
| 8              | ECM_RECEPTOR_INTERACTION                                    | RYBOSOME                               | NUCLEOTIDE_EXCISION_REPAIR             | NUCLEOTIDE_EXCISION_REPAIR              | NUCLEOTIDE_EXCISION_REPAIR             | NUCLEOTIDE_EXCISION_REPAIR             | NUCLEOTIDE_EXCISION_REPAIR             |
| 9              | COMPLEMENT_AND_COAGULATION_CASCADES                         | JAK_STAT_SIGNALING_PATHWAY             | BASE_EXCISION_REPAIR                   | OCYTE_MEIOSIS                           | OCYTE_MEIOSIS                          | OCYTE_MEIOSIS                          | OCYTE_MEIOSIS                          |
| 10             | INTESTINAL_IMMUNE_NETWORK_FOR_IGA_PRODUCING_CELL_ACTIVATION | PS3_SIGNALING_PATHWAY                  | OCYTE_MEIOSIS                          | WNT_SIGNALING_PATHWAY                   | WNT_SIGNALING_PATHWAY                  | WNT_SIGNALING_PATHWAY                  | WNT_SIGNALING_PATHWAY                  |
| 11             | SMALL_CELL_LUNG_CANCER                                      | NUCLEOTIDE_EXCISION_REPAIR             | NUCLEOTIDE_EXCISION_REPAIR             | JAK_STAT_SIGNALING_PATHWAY              | JAK_STAT_SIGNALING_PATHWAY             | JAK_STAT_SIGNALING_PATHWAY             | JAK_STAT_SIGNALING_PATHWAY             |
| 12             | PPAR_SIGNALING_PATHWAY                                      | PROGESTERONE_MEDIATED_OOCYTE_MATURATIO | PROGESTERONE_MEDIATED_OOCYTE_MATURATIO | PPAR_SIGNALING_PATHWAY                  | PPAR_SIGNALING_PATHWAY                 | PPAR_SIGNALING_PATHWAY                 | PPAR_SIGNALING_PATHWAY                 |
| 13             | ALLOGRAFT_REJECTION                                         | SMALL_CELL_LUNG_CANCER                 | WNT_SIGNALING_PATHWAY                  | BASE_EXCISION_REPAIR                    | BASE_EXCISION_REPAIR                   | BASE_EXCISION_REPAIR                   | BASE_EXCISION_REPAIR                   |
| 14             | GLYCOSAMINOGLYCAN_BIOSYNTHESIS_HEPARAN                      | WNT_SIGNALING_PATHWAY                  | PPAR_SIGNALING_PATHWAY                 | PATHOGENIC_ESCHERICHIA_COLI_INFECTION   | GLYCOLIPID_METABOLISM                  | JAK_STAT_SIGNALING_PATHWAY             | JAK_STAT_SIGNALING_PATHWAY             |
| 15             | AUTODIAPYCNOSIS                                             | MELANOMA                               | PROGESTERONE_MEDIATED_OOCYTE_MATURATIO | PROGESTERONE_MEDIATED_OOCYTE_MATURATIO  | MELANOMA                               | PROGESTERONE_MEDIATED_OOCYTE_MATURATIO | PROGESTERONE_MEDIATED_OOCYTE_MATURATIO |
| 16             | FOCAL_ADHESION                                              | ONE_CARBON_POOL_BY_FOLATE              | AMYOTROPIC_LATERAL_SCLEROSIS_ALS       | SPICEOSOME                              | PROGESTERONE_MEDIATED_OOCYTE_MATURATIO | WNT_SIGNALING_PATHWAY                  | WNT_SIGNALING_PATHWAY                  |
| 17             | VIRAL_MYOCARDITIS                                           | BASE_EXCISION_REPAIR                   | THYROID_CANCER                         | BIOSYNTHESIS_OF_UNSATURATED_FATTY_ACIDS | PPAR_SIGNALING_PATHWAY                 | PATHOGENIC_ESCHERICHIA_COLI_INFECTION  | PATHOGENIC_ESCHERICHIA_COLI_INFECTION  |
| 18             | BIOSYNTHESIS_OF_UNSATURATED_FATTY_ACIDS                     | SPICEOSOME                             | PS3_SIGNALING_PATHWAY                  | GLYCOLIPID_METABOLISM                   | THYROID_CANCER                         | BASE_EXCISION_REPAIR                   | BASE_EXCISION_REPAIR                   |
| 19             | BLADDER_CANCER                                              | THYROID_CANCER                         | PEROXISOME                             | PEROXISOME                              | BLADDER_CANCER                         | BLADDER_CANCER                         | BLADDER_CANCER                         |
| 20             | GRAFT_VERSUS_HOST_DISEASE                                   | BLADDER_CANCER                         | MELANOMA                               | GLIOMA                                  | ARACHIDONIC_ACID_METABOLISM            | PS3_SIGNALING_PATHWAY                  | PS3_SIGNALING_PATHWAY                  |

**Supplemental Table 3. Percentages of Tumor Volumes in Each Treatment Group (Related to Figure 7E).**

| <b>Treatment</b>        | <b>%T/C</b> |
|-------------------------|-------------|
| Vehicle control         | 100         |
| PLX4720 200mg/kg diet   | 51.41       |
| 2,4-DNP 20mg/kg QD p.o. | 101.96      |
| PLX4720 + 2,4-DNP       | 42.7        |

**Supplemental Table 4. Percentages of Tumor Volumes in Each Treatment Group (Related to Figure 7F).**

| <b>Treatment</b>           | <b>%T/C</b> |
|----------------------------|-------------|
| Vehicle control            | 100         |
| PLX4720 200mg/kg diet      | 56.88       |
| Gamitrinib 5mg/kg QD i.p.  | 124.59      |
| Gamitrinib 15mg/kg QD i.p. | 57.3        |
| PLX4720 + Gami 5mg/kg      | 25.9        |
| PLX4720 + Gami 15mg/kg     | 6.99        |

**Supplemental Table 5. Percentages of Tumor Volumes in Each Treatment Group (Related to Figure 7G).**

| <b>Treatment</b>           | <b>%T/C</b> |
|----------------------------|-------------|
| Vehicle control            | 100         |
| PLX4720 200mg/kg diet      | 56.14       |
| Gamitrinib 15mg/Kg QD i.p. | 44.63       |
| PLX4720 + Gami 15mg/Kg     | 16.36       |

**Supplemental Table 6. The Hospital of University of Pennsylvania Patients' Clinical Information (Related to Table 2)**

| MP#    | Biopsy Date | Biopsy Type                                                           | Tissue Type      | Sp to Rx Time (Pre/Post) | Progression Sp (Yes/No) | Study Drug         | Date on C1D1 | Date of PD | Evidence of progression                                                                   | Date of Last Dose                                                                                                |
|--------|-------------|-----------------------------------------------------------------------|------------------|--------------------------|-------------------------|--------------------|--------------|------------|-------------------------------------------------------------------------------------------|------------------------------------------------------------------------------------------------------------------|
| 578    | 1/5/10      | L arm excision                                                        | In transit Mets  | Pre                      | NA                      | RO5185426          | 2/18/10      | 3/2/11     | new brain mets with cerebral edema                                                        | 3/3/11                                                                                                           |
| 578    | 3/3/11      | Left parietal craniotomy                                              | Brain Mets       | Post                     | Yes                     | RO5185426          | 2/18/10      | 3/2/11     | new brain mets with cerebral edema                                                        | 3/3/11                                                                                                           |
| 610    | 5/27/05     | R. axillary                                                           | LN Mets          | Pre                      | NA                      | RO 5185426         | 12/16/09     | 10/7/10    | progression of nontarget disease - other lung nodules and at wrist on most recent imaging | 10/14/10                                                                                                         |
| 610    | 10/15/10    | R wrist/R breast                                                      | SubQ Mets        | Post                     | Yes                     | RO 5185426         | 12/16/09     | 10/7/10    | progression of nontarget disease - other lung nodules and at wrist on most recent imaging | 10/14/10                                                                                                         |
| 11_3   | 7/15/08     | R axillary                                                            | R axilla mets    | Pre                      | NA                      | Arm A / RO5185426  | 9/24/10      | 6/6/11     | C13, new skin lesions                                                                     | still on drug                                                                                                    |
| 11_3   | 6/6/11      | (B)R. axillary, (C)L. shoulder, (D) L. flank lesions Excisional in VA | metastatic       | Post                     | Yes                     | Arm A / RO5185426  | 9/24/10      | 6/6/11     | C13, new skin lesions                                                                     | still on drug                                                                                                    |
| 503    | 1/7/09      | Excisional, small bowel, retroperitoneal mets resection               | Visceral Mets    | Pre                      | NA                      | PLX 4032           | 5/5/09       | NA         | NA                                                                                        | off of drug due to CHF on 11/16/12 (best estimate for date off of drug). Sometime between 11/01/12 and 01/29/13. |
| 503    | 9/22/10     | R back excision                                                       | SubQ Mets        | Post                     | No                      | PLX 4032           | 5/5/09       | NA         | NA                                                                                        | off of drug due to CHF on 11/16/12 (best estimate for date off of drug). Sometime between 11/01/12 and 01/29/13. |
| 11_35  | 6/21/11     | 4mm punchx2                                                           | SubQ Mets        | Pre                      | NA                      | R05185426          | 7/12/11      |            | Patient is being treated by a local oncologist at the University of Maryland              | NA                                                                                                               |
| 11_35  | 7/26/11     | 4 mm punch                                                            | SubQ Mets        | Post                     | NA                      | R05185426          | 7/12/11      |            | Patient is being treated by a local oncologist at the University of Maryland              | NA                                                                                                               |
| 11_47  | 6/25/10     | Skin and L inguinal LN                                                | LN and SubQ Mets | Pre                      | NA                      | R05185426          | 6/14/11      | 2/3/12     | progressive CNS disease                                                                   | 2/9/12                                                                                                           |
| 11_47  | 2/9/12      | R Parietal lobe Excisional                                            | brain mets       | Post                     | Yes                     | R05185426          | 6/14/11      | 2/3/12     | progressive CNS disease                                                                   | 2/9/12                                                                                                           |
| 12_161 | 4/9/10      | R. Scalp WE                                                           | SubQ Primary     | Pre                      | NA (neoadjuvant)        | Zelboraf           | 10/11/11     | 4/27/12    | Mets to liver, abdominal wall                                                             | 1/22/12                                                                                                          |
| 12_161 | 2/8/12      | R parotid gland Excisional                                            | LN Mets          | Post                     | NA (neoadjuvant)        | Zelboraf           | 10/11/11     | 4/27/12    | Mets to liver, abdominal wall                                                             | 1/22/12                                                                                                          |
| 11_20  | 6/4/2010    | L inguinal                                                            | LN Mets          | Pre                      | NA                      | Part C Combo 1 Arm | 3/1/11       | 8/30/11    | scans show progression to last scans but better than baseline                             | 8/29/11                                                                                                          |
| 11_20  | 10/14/11    | R chest wall excisional                                               | SubQ Mets        | Post                     | Yes                     | Part C Combo 1 Arm | 3/1/11       | 8/30/11    | scans show progression to last scans but better than baseline                             | 8/29/11                                                                                                          |
| 11_6   | 3/31/11     | R Chest                                                               | SubQ Mets        | Pre                      | NA                      | Part C Combo 1 Arm | 4/7/11       | 1/12/12    | more lesions grew                                                                         | 2/8/12                                                                                                           |
| 11_6   | 4/21/11     | R chest wall skin excisional                                          | In transit Mets  | Post                     | No                      | Part C Combo 1 Arm | 4/7/11       | 1/12/12    | more lesions grew                                                                         | 2/8/12                                                                                                           |

**Supplemental Table 7. Analysis of the Association of Expression of MitoB Genes in Pre-treatment Tumor Biopsies with Patients' Overall Survival (Related to Figure 7)**

| outcome | Gene-Pre | Hazard ratio | min95 | max95  | p-value |
|---------|----------|--------------|-------|--------|---------|
| OS      | C10orf2  | 1.08         | 0.336 | 3.472  | 0.897   |
| OS      | DNM1L    | 1.635        | 0.732 | 3.649  | 0.2302  |
| OS      | ESRRA    | 1.201        | 0.421 | 3.427  | 0.7324  |
| OS      | FIS1     | 0.593        | 0.232 | 1.512  | 0.2736  |
| OS      | HSPD1    | 1.821        | 0.748 | 4.436  | 0.1867  |
| OS      | MFN1     | 2.401        | 0.46  | 12.539 | 0.2991  |
| OS      | MFN2     | 0.811        | 0.315 | 2.087  | 0.6645  |
| OS      | NFE2L2   | 0.797        | 0.512 | 1.242  | 0.3168  |
| OS      | OPA1     | 1.331        | 0.659 | 2.687  | 0.4257  |
| OS      | PHB      | 1.255        | 0.488 | 3.228  | 0.6368  |
| OS      | PHB2     | 1.535        | 0.575 | 4.099  | 0.3925  |
| OS      | POLG     | 1.891        | 0.485 | 7.379  | 0.359   |
| OS      | POLG2    | 1.193        | 0.31  | 4.598  | 0.7976  |
| OS      | PPARGC1A | 1.438        | 0.972 | 2.128  | 0.0691  |
| OS      | PPARGC1B | 1.408        | 0.617 | 3.21   | 0.416   |
| OS      | PPRC1    | 1.561        | 0.275 | 8.859  | 0.6151  |
| OS      | SOD2     | 0.766        | 0.455 | 1.291  | 0.3168  |
| OS      | TFAM     | 1.519        | 0.635 | 3.63   | 0.3473  |
| OS      | TFB1M    | 0.985        | 0.334 | 2.906  | 0.9775  |
| OS      | TFB2M    | 1.017        | 0.467 | 2.213  | 0.966   |
| OS      | TRAP1    | 2.338        | 0.784 | 6.971  | 0.1276  |
| OS      | TUFM     | 2.01         | 0.709 | 5.7    | 0.1892  |
| OS      | VDAC1    | 8.135        | 1.103 | 59.978 | 0.0397  |

**Abbreviations:**

OS: overall survival; Pre: pre-treatment.



**Supplemental Table 8. Analysis of the Association of the Expression of MitoB Genes in Post-treatment Tumor Biopsies with Patients' Overall Survival (Related to Figure 7)**

| outcome | Gene-Prog | Hazard ratio | min95 | max95  | p-value |
|---------|-----------|--------------|-------|--------|---------|
| OS      | C10orf2   | 1.047        | 0.391 | 2.805  | 0.9271  |
| OS      | DNM1L     | 1.011        | 0.522 | 1.959  | 0.9731  |
| OS      | ESRRA     | 1.021        | 0.464 | 2.248  | 0.9581  |
| OS      | FIS1      | 0.787        | 0.415 | 1.495  | 0.4645  |
| OS      | HSPD1     | 1.178        | 0.726 | 1.913  | 0.507   |
| OS      | MFN1      | 0.877        | 0.19  | 4.054  | 0.8663  |
| OS      | MFN2      | 1.039        | 0.407 | 2.655  | 0.9356  |
| OS      | NFE2L2    | 1.012        | 0.772 | 1.327  | 0.9298  |
| OS      | OPA1      | 1.155        | 0.658 | 2.027  | 0.6159  |
| OS      | PHB       | 1.098        | 0.482 | 2.502  | 0.8242  |
| OS      | PHB2      | 1.643        | 0.615 | 4.386  | 0.3219  |
| OS      | POLG      | 1.643        | 0.464 | 5.815  | 0.4416  |
| OS      | POLG2     | 1.079        | 0.458 | 2.541  | 0.8618  |
| OS      | PPARGC1A  | 1.292        | 0.915 | 1.825  | 0.1453  |
| OS      | PPARGC1B  | 1.172        | 0.594 | 2.313  | 0.6469  |
| OS      | PPRC1     | 1.007        | 0.383 | 2.648  | 0.9886  |
| OS      | SOD2      | 0.634        | 0.392 | 1.025  | 0.0628  |
| OS      | TFAM      | 1.053        | 0.562 | 1.974  | 0.8718  |
| OS      | TFB1M     | 0.173        | 0.042 | 0.717  | 0.0156  |
| OS      | TFB2M     | 1.097        | 0.703 | 1.71   | 0.6836  |
| OS      | TRAP1     | 2.054        | 0.605 | 6.969  | 0.2484  |
| OS      | TUFM      | 3.65         | 1.105 | 12.053 | 0.0337  |
| OS      | VDAC1     | 1.468        | 0.572 | 3.765  | 0.4246  |

**Abbreviations:**

OS: overall survival; Prog: progressive.

**Supplemental Table 9. Analysis of the Association of Expression of MitoB Genes in Pre-treatment Tumor Biopsies with Patients' Progression-Free Survival (Related to Figure 7)**

| outcome | Gene-Pre | Hazard ratio | min95 | max95  | p-value |
|---------|----------|--------------|-------|--------|---------|
| PFS     | C10orf2  | 0.518        | 0.198 | 1.35   | 0.1783  |
| PFS     | DNM1L    | 2.121        | 1.021 | 4.405  | 0.0438  |
| PFS     | ESRRA    | 0.708        | 0.338 | 1.484  | 0.3608  |
| PFS     | FIS1     | 0.591        | 0.274 | 1.276  | 0.1804  |
| PFS     | HSPD1    | 2.666        | 1.051 | 6.764  | 0.039   |
| PFS     | MFN1     | 2.704        | 0.576 | 12.7   | 0.2074  |
| PFS     | MFN2     | 0.793        | 0.395 | 1.593  | 0.5148  |
| PFS     | NFE2L2   | 1.13         | 0.788 | 1.619  | 0.5068  |
| PFS     | OPA1     | 1.377        | 0.795 | 2.384  | 0.2534  |
| PFS     | PHB      | 1.165        | 0.569 | 2.389  | 0.6759  |
| PFS     | PHB2     | 0.7          | 0.292 | 1.677  | 0.4239  |
| PFS     | POLG     | 0.866        | 0.314 | 2.385  | 0.7806  |
| PFS     | POLG2    | 1.789        | 0.597 | 5.363  | 0.299   |
| PFS     | PPARGC1A | 1.229        | 0.867 | 1.744  | 0.2471  |
| PFS     | PPARGC1B | 0.774        | 0.39  | 1.534  | 0.463   |
| PFS     | PPRC1    | 0.602        | 0.17  | 2.13   | 0.4315  |
| PFS     | SOD2     | 0.938        | 0.608 | 1.447  | 0.7737  |
| PFS     | TFAM     | 1.68         | 0.725 | 3.893  | 0.2264  |
| PFS     | TFB1M    | 1.149        | 0.415 | 3.181  | 0.7894  |
| PFS     | TFB2M    | 1.14         | 0.685 | 1.897  | 0.6142  |
| PFS     | TRAP1    | 1.056        | 0.515 | 2.166  | 0.8823  |
| PFS     | TUFM     | 0.869        | 0.414 | 1.822  | 0.7099  |
| PFS     | VDAC1    | 5.077        | 1.014 | 25.415 | 0.048   |

**Abbreviations:**

PFS: progression-free survival; Pre: pre-treatment.

**Supplemental Table 10. Analysis of the Association of Expression of MitoB Genes in Post-treatment Tumor Biopsies with Patients' Progression-Free Survival (Related to Figure 7)**

| outcome | Gene-prog | Hazard ratio | min95 | max95 | p-value |
|---------|-----------|--------------|-------|-------|---------|
| PFS     | C10orf2   | 1.289        | 0.5   | 3.322 | 0.5988  |
| PFS     | DNM1L     | 0.623        | 0.398 | 0.974 | 0.0379  |
| PFS     | ESRRA     | 1.304        | 0.603 | 2.82  | 0.5     |
| PFS     | FIS1      | 0.999        | 0.514 | 1.94  | 0.9979  |
| PFS     | HSPD1     | 0.754        | 0.506 | 1.123 | 0.1646  |
| PFS     | MFN1      | 0.359        | 0.136 | 0.947 | 0.0384  |
| PFS     | MFN2      | 1.576        | 0.565 | 4.393 | 0.3847  |
| PFS     | NFE2L2    | 0.958        | 0.747 | 1.228 | 0.7337  |
| PFS     | OPA1      | 0.809        | 0.516 | 1.268 | 0.3551  |
| PFS     | PHB1      | 1.023        | 0.543 | 1.929 | 0.9438  |
| PFS     | PHB2      | 1.796        | 0.713 | 4.522 | 0.2139  |
| PFS     | POLG      | 1.263        | 0.5   | 3.193 | 0.6217  |
| PFS     | POLG2     | 0.761        | 0.364 | 1.591 | 0.4676  |
| PFS     | PPARGC1A  | 1.105        | 0.702 | 1.74  | 0.6659  |
| PFS     | PPARGC1B  | 0.837        | 0.268 | 2.607 | 0.7582  |
| PFS     | PPRC1     | 0.879        | 0.346 | 2.233 | 0.7864  |
| PFS     | SOD2      | 1.138        | 0.646 | 2.006 | 0.654   |
| PFS     | TFAM      | 0.669        | 0.394 | 1.137 | 0.1371  |
| PFS     | TFB1M     | 0.559        | 0.226 | 1.382 | 0.2079  |
| PFS     | TFB2M     | 0.918        | 0.637 | 1.323 | 0.6459  |
| PFS     | TRAP1     | 1.165        | 0.507 | 2.679 | 0.7185  |
| PFS     | TUFM      | 1.484        | 0.704 | 3.127 | 0.2994  |
| PFS     | VDAC1     | 0.767        | 0.275 | 2.141 | 0.6129  |

**Abbreviations:**

PFS: progression-free survival; Prog: progressive.

## Supplemental Methods

### Cell lines established from human melanomas and patient-derived xenografts

All human metastatic melanoma cell lines that were established at the Wistar Institute have been previously described (44). UACC-62 and UACC-903 cells were kind gifts from Dr. Marianne B. Powell (Stanford University, Stanford, CA 94305, USA). A375 cells were purchased from ATCC. LOX-IMVI cells were kindly provided by Dr. Lin Zhang (University of Pennsylvania, Philadelphia, PA 19104, USA). All resistant cell lines that acquired drug resistance to PLX4720 (hereafter referred to as “BR” cell lines) or the combination of PLX4720 and PD0325901 (hereafter referred to as “CR” cell lines) were established after continuous exposure to PLX4720 at 10  $\mu$ M or the combination of PLX4720 at 10  $\mu$ M and PD0325901 at 1  $\mu$ M. Fine needle aspiration (FNA) tumor samples derived from melanoma patients were directly transplanted and grown in mice. Tumors were harvested, fragmented and re-transplanted in mice to establish melanoma patient-derived xenografts (PDX). Short-term primary cultures established from resistant PDXs (hereafter referred to as “RPDX” cell lines) were maintained in the presence of PLX4720 at 1 $\mu$ M. All cell lines were maintained in RPMI-1640 media (Mediatech, Inc.) supplemented with 10% fetal bovine serum (Tissue Culture Biologicals) and cultured in a 37° C humidified incubator supplied with 5% CO<sub>2</sub>. All cell lines were authenticated by DNA fingerprinting.

### Chemicals

The BRAF inhibitor PLX4720 and the MEK inhibitor PD0325901 were provided by Plexxikon Inc. The BRAF inhibitor GSK2118436 and the MEK inhibitor GSK1120212B were provided by GlaxoSmithKline. The BRAF inhibitor LGX818, the MEK inhibitor MEK162 and the mTOR inhibitor BEZ235 were provided by Novartis. The ERK inhibitor SCH772984 was provided by Merck & Co. Rapamycin was purchased from LC Laboratories. Gamitrinib has been previously

described (41). Spautin-1 was purchased from EMD Millipore. Phenformin and 2,4-DNP were purchased from Sigma. All siRNA clones were synthesized by Qiagen.

### **Reagents**

CellTrace™ Violet (cat. # C34557), CellROX Deep Red (cat. # C10422), CyQUANT (cat. # 7026) and MitoTracker® Red CM-H2Xros (cat. # M-7513) were purchased from Life Technologies. Propidium iodide solution (cat. # P4864-10ML) was purchased from Sigma. PSVue® 643 (cat. # P-1006) was purchased from Molecular Targeting Technologies. 2-NBDG (cat. # 11046) was purchased from Cayman Chemical. CellTiter-Glo® Assay (cat. # G7570) was purchased from Promega. Extracellular O<sub>2</sub> probe (cat. # ab140097) was purchased from Abcam. All antibodies were purchased from Cell Signaling. MT-CO1, MitoProfile® Total OXPHOS Human WB and MitoBiogenesis™ Western Blot Cocktail were purchased from Abcam.

### **Plasmids, Lentiviral Production and Infection**

The pLVO-Puro-mCherry-eGFP-LC3 plasmid has been previously described (45). 293T cells were co-transfected with packaging and envelope plasmids, pCMV and pVsvg with pLVO-Puro-mCherry-eGFP-LC3 and Lipofectamine 2000 (Life Technologies). Supernatants containing lentiviral particles were collected every 24 h for 3 days, and were then pooled, filtered and aliquoted. Vials of lentiviral particles were stored in a -80°C freezer. Adherent WM9 and 1205Lu melanoma cells were infected overnight with lentiviral particles supplemented with polybrene (Sigma) at 8 µg/ml. Stably infected clones were established by an initial selection with puromycin at 1 µg/ml for 48 h, followed by FACS sorting.

### **Drug Sensitivity IC<sub>50</sub> Data**

IC<sub>50</sub> data of human melanoma cell lines with *BRAF*<sup>V600</sup> mutations to selective BRAF and MEK inhibitors were curated from the Cancer Cell Line Encyclopedia (CCLE).

### **Cell Growth/Viability and Assessment of Cell Clonogenicity**

Cell viability was measured by the MTT assay or CellTiter-Glo luminescent cell viability assay (Promega). For the assessment of cell clonogenicity, cells were seeded into 12-well tissue culture plates at a density of 500 cells/well as biological triplicates in drug-free medium. Medium was refreshed every 3 or 4 days for 14 days. Colonies were then stained overnight with methanol containing 0.05% crystal violet. After extensive washing with distilled H<sub>2</sub>O, cells were air-dried and subjected to image acquisition using a Nikon D200 DLSR camera.

### **CellTrace Violet Labeling and CellROX Deep Red and MitoTracker Red Staining**

Adherent melanoma cells were harvested with 0.05% Trypsin-EDTA and were washed once with 1X DPBS. Cells were labeled with CellTrace<sup>TM</sup> Violet according to the manufacturer's protocol and were allowed to adhere to tissue culture plates overnight following the drug treatment. At indicated time points following the drug treatment, floating and adherent cells were pooled, washed with Hank's Buffered Salt Solution (HBSS) and then stained with CellROX Deep Red at 2.5  $\mu$ M or MitoTracer Red at 0.25  $\mu$ M for 1 h in a 37°C humidified incubator supplied with 5% CO<sub>2</sub>. Cells were then pelleted, washed with DPBS, and stained with PSVue® 643 at 5  $\mu$ M diluted in TES buffer for 5 min in the dark. Cells were then immediately subjected to FACS analysis using a BD LSR II flow cytometer and at least 5,000 cells per sample were acquired.

### **Measurement of 2-(N-(7-nitrobenz-2-oxa-1,3-diazol-4-yl)amino)-2-deoxyglucose (2-NBDG)**

#### **Uptake**

Cells were washed with HBSS and were then pre-incubated with Opti-MEM (Life Technologies) for 15 min. Cells were then incubated with DMEM deprived of glucose, glutamine and phenol red (Life Technologies, cat. # A14430-01) and Fetal Bovine Serum that was supplemented with 2-NBDG (Cayman Chemical, cat. # 11046) at 10 mg/ml for 1 h. Cells were washed with HBSS and were immediately harvested for FACS analysis.

### **Measurement of Autophagic Flux**

WM9 cells stably expressing pLVO-Puro-mCherry-eGFP-LC3 were analyzed with a BD LSR II flow cytometer. Fluorescence of mCherry and eGFP was recorded to derive the ratio of mCherry-height over eGFP-height. This ratio indicates the autophagic flux.

### **Measurement of ATP Production**

Cells were seeded into Black Plate, Clear Bottom 96 Well Assay Plates (Corning Inc., cat. # 3603) at a density of 5,000 cells/well. Immediately following the drug treatment, culture media were removed. Cells in each well were incubated with a mixture of reagents containing 50  $\mu$ l DPBS, 50  $\mu$ l reconstituted CellTiter-Glo® Assay and 0.5  $\mu$ l CyQUANT for 10 min in the dark. Both ATP luminescence and CyQUANT fluorescence were recorded with a BioTek Multi-Mode Microplate Reader. The ATP production per cell was calculated as the ratio of ATP luminescence over CyQUANT fluorescence.

### **Measurement of Basal Oxygen Consumption**

Cells were seeded into Black Plate, Clear Bottom 96 Well Assay Plates at a density of 5,000 cells/well. Immediately following the drug treatment, the culture medium in each well was removed and replaced with 140  $\mu$ l 10% DMEM deprived of glucose, glutamine and phenol red that was supplemented with 10  $\mu$ l reconstituted extracellular O<sub>2</sub> probe. Cells were incubated for 2 h at 37°C in a humidified incubator supplied with 5% CO<sub>2</sub>. Fluorescence of the extracellular O<sub>2</sub> probe was recorded with a BioTek Multi-Mode Microplate Reader. Cell numbers were determined using identical plates in the same experimental setting. The basal oxygen consumption per cell was calculated as the ratio of the extracellular O<sub>2</sub> probe fluorescence over CyQUANT fluorescence.

### **Quantification of Mitochondrial DNA Copy Number**

Mitochondria DNA copy number was measured by the ratio of a mitochondrial gene, mtDNA-3, and a nuclear gene, 18S rRNA. The mtDNA-3/18S rRNA ratio was quantified by qRT-PCR on an Applied Biosystems 7500 Fast Real-Time PCR System. The reaction mixtures (25  $\mu$ L final volume) contained 12.5  $\mu$ L Fast SYBR Green Master Mix, 500 nM of each primer and 10 ng genomic DNA. The reaction conditions were 95°C for 20 s, followed by 45 cycles of 95°C for 3 s and 60°C for 30 s. The relative mtDNA copy number was analyzed by the  $2^{-\Delta\Delta C_t}$  method.

### **Quantitative Real-Time PCR**

One  $\mu$ g total mRNA was reverse transcribed using a Maxima First Strand cDNA Synthesis Kit for qRT-PCR (Thermo Fisher). Fast SYBR® Green Master Mix (Life Technologies) was used with cDNA template and primers to evaluate the expression of target genes and GAPDH. Primers used were purchased from Integrated DNA Technologies. Amplifications were performed using an Applied Biosystems® 7500 Real-Time PCR System (Life Technologies). All experiments were performed in triplicate. Expression ratios of controls were normalized to 1. Please see Extended Experimental Procedures for the list of PCR primer sequences.

### **Time-Course Illumina Gene Expression Microarray and Data Analysis**

WM9 melanoma cells treated with PLX4720 at 10  $\mu$ M were washed twice with HBSS and harvested directly with TRI Reagent® (Sigma) at various time points (0, 12, 24, 48, 60, 72 and 96 h) after drug treatment. WM9 melanoma cells were treated with DMSO and harvested directly with TRI Reagent® (Sigma) at 96 h. RNA isolation and cDNA synthesis was performed in the Wistar Genomics Facility. Illumina HumanHT-12 v4 Expression BeadChips were hybridized, labeled and processed according to the manufacturer's protocol. Microarray data were obtained from 2 independent biological replicates per time point.

### **Gene Expression Microarray Data and TCGA Melanoma Patients' RNA-seq Data**



Normalized CCLE gene expression microarray data were directly downloaded from Broad CCLE (<http://www.broadinstitute.org/ccle>). Gene expression microarray data of A375 and SK-MEL-28 melanoma cells were downloaded from GEO under accession numbers GSE42872 and GSE37441, respectively. Gene expression microarray data of Malme-3M and COLO829 melanoma cells were downloaded from GEO under the accession number GSE51113. Normalized RNA-seq data of TCGA melanoma patients were downloaded from TCGA Data Portal (<https://tcga-data.nci.nih.gov/tcga/>). Single sample gene set enrichment analysis (ssGSEA) was performed in each data set to calculate an enrichment score of each gene set.

### **Analysis of Illumina Gene Expression Microarray Data and Reverse Phase Protein Array (RPPA) Data**

The raw data of gene expression microarrays generated from Illumina Chips were normalized, background-corrected and summarized using the R package “lumi”. Probes below background level (detection P-value <0.01) were excluded and differential expression was identified with Bayes-adjusted variance analysis using the Bioconductor Limma package. To reduce false positives, the unexpressed probes were removed. The R package “limma” was employed for gene differential expression analysis, followed by multiple test correction by the Benjamini and Hochberg procedure. Genes with adjusted p values < 0.05 and fold change > 2 were claimed as significantly differentially expressed and were subjected to the hypergeometric test for gene set enrichment analysis (GSEA). We also conducted GSEA as previously reported. For GSEA, we analyzed gene sets obtained from the Molecular Signatures Database ([www.broadinstitute.org/gsea/msigdb/](http://www.broadinstitute.org/gsea/msigdb/)). The same differential expression analysis method was applied to RPPA data.

### **Relapsed Melanoma Patients’ Gene Expression Microarray and RNA-seq data**

Gene expression microarray data and RNA-sequencing data of paired pre- and post-treatment tumor biopsies derived from melanoma patients were downloaded from GEO under accession number GSE50509, GSE50535, GSE61992 and GSE65185 and from EGA under accession number EGAS00001000992. Data were normalized, background-corrected and summarized using the R package “lumi”. We then selected patients whose 30% quantile of genes in the OxPhos gene set under the Prog condition was positive. We then conducted one-way clustering of the OxPhos genes over the selected samples.

### **Kaplan-Meier Survival Analysis of TCGA Melanoma Patient Data**

We clustered TCGA melanoma patient RNA-seq data into 2 groups using Cox regression analysis based on expression of 18 MitoBiogenesis genes. We also clustered TCGA melanoma patient RNA-seq data into 4 groups using k-means based on expression of 62 “Glycolysis” genes and 117 “OxPhos” genes. We clustered TCGA melanoma patient RNA-seq data into 2 groups based on expression of PPARGC1A. We then performed a log-rank test to test the survival rate difference between these subgroups.

### **Immunohistochemistry**

Tissues were stained with TFAM (Cell Signaling; Catalog# 8076), TRAP-1 (Thermo Scientific™ Pierce; Catalog# PIPA527596) and MT-CO1 (Abcam; Catalog# 14705) according to the manufacturer's instructions. Melanoma samples were stained with a red chromogen to distinguish true staining from melanin. All stained tissues were blindly evaluated by a pathologist at Hospital of the University of Pennsylvania.

### **Western Blotting and Antibodies**

Cells were washed with ice-cold PBS containing 100  $\mu$ M  $\text{Na}_3\text{VO}_4$  and scraped off culture dishes. After centrifugation, cell pellets were lysed in buffer containing 10 mM Tris-HCl, pH 7.8, 150

mM NaCl, 1 mM EDTA, 1% Nonidet P-40, 1 mM Na<sub>3</sub>VO<sub>4</sub> and protease inhibitors (Roche complete protease inhibitor tablets). Lysates were cleared by micro-centrifugation and protein concentrations were determined with Protein Assay Dye Reagent Concentrate (Bio-Rad). For western blots, 25 µg of each lysate were run on 15-well 10% or 12% SDS-PAGE gels and transferred onto nitrocellulose membranes using a dye fast Trans-Blot<sup>R</sup> Turbo<sup>TM</sup> transfer system (Bio-Rad). Blots were blocked in SEA BLOCK Blocking Buffer (Thermo Scientific) diluted with 1X TBS at 1:1 ratio at room temperature for 1 h, incubated overnight with primary antibody at 4°C, stained with secondary antibodies conjugated to IRDye® Infrared Dyes (LI-COR Biosciences) and then visualized using an Odyssey flat bed scanner (LI-COR Biosciences).

### **Time-course Gene Expression Microarray Data Analysis and GSEA**

Time-course gene expression microarray raw data were normalized, background corrected and summarized using the R package “lumi. To reduce false positives, unexpressed probes were removed, leaving 23,569 probes that were examined in all experiments described herein. When multiple probe IDs interrogated the same gene, the maximum value was taken as the gene expression level, which was used in the downstream data analysis. Fold changes were calculated by comparing the difference in the mean of gene expression levels of 3 biological replicates between pre-treatment and post-treatment derived at different time points. Student’s T-test was used to obtain the parametric p values for measuring the significance of gene expression level differences. Genes with p value < 0.01 and fold change >1.2 (up- or down-regulated) were claimed to be significantly up- or down-regulated, which were then subjected to hypergeometric test based GSEA. 1,453 canonical pathways were obtained from the Molecular Signatures Database (MSigDB) (<http://www.broadinstitute.org/gsea/msigdb/index.jsp>) for GSEA. We only considered pathways that contain at least 10 genes and at most 150 genes profiled and expressed in the experiment. Two-way hierarchical clustering was performed and plotted using the “heatplot” function in the R package “made4”, with the basis of Euclidean distance, centering log-

transformed gene expression by mean and single linkage clustering. Genes that are up- or down-regulated at one or more time points were subjected to the two-way clustering analysis to generate the heatmaps.

## **Prognostic Analysis of Mitochondrial Biogenesis Biomarkers using Relapsed Melanoma**

### **Patients' Gene Expression Microarray Data**

Univariate Cox regression models were used to test the associations between those mitochondrial biogenesis biomarkers in relapsed melanoma patients' pre-treatment and early on-treatment tumor biopsies with progression-free survival and overall survival.

### **qRT-PCR Primer Sequences**

| <b>Gene Name</b> | <b>Forward Sequence</b>       | <b>Reverse Sequence</b>         |
|------------------|-------------------------------|---------------------------------|
| ALDH1A1          | TGT TAG CTG ATG CCG ACT TG    | TTC TTA GCC CGC TCA ACA CT      |
| ATP5B            | CAAGTCATCAGCAGGCACAT          | TGGCCACTGACATGGGTACT            |
| ATP5D            | TTTGTGAGCAGCGGTTCCAT          | GGCCTTCTCCAAGTTTGCCT            |
| ATP5G1           | GCCTGATTAGACCCCTGGTA          | GGCTAAAGCTGGGAGACTGA            |
| ATP5L            | AAGAAATTGAGCGGCATAAG          | GGAAGCACACAGGTTGATTT            |
| COX II           | CCATCCCTACGCATCCTTTAC         | GTTTGCTCCACAGATTCAGAG           |
| COX5A            | CGAGCATCAAACCTCCTCAT          | GAGGCCTCCTGCACTCC               |
| COX6A1           | ATGGCGGTAGTTGGTGTGTC          | GTGAGAGTCTTCCACATGCGA           |
| COX6C            | CAAAGAAAGAAGGCATACGCAGAT      | CTGAAAGATAACCAGCCTTCCTCAT       |
| COX7B            | CTTGGTCAAAGCGCACTAAATC        | CTATTCCGACTTGTGTTGCTACA         |
| HBB              | GTGAAGGCTCATGGCAAGA           | AGCTCACTCAGGTGTGGCAAAG          |
| HIF-1 $\alpha$   | TATTGCACTGCACAGGCCACATTC      | TGATGGGTGAGGAATGGGTTTCA         |
| M-MITF           | CCGTCTCTCACTGGATTGGT          | TACTTGGTGGGGTTTTTCGAG           |
| MTCO1_4          | GAGCTGCTGTTTCGGTGTCC          | TGCCAGTGGTAGAGATGGTTG           |
| MTCO1_5          | ACCC TAGA CCAA ACCT ACGC CAAA | TAGG CCGA GAAA GTGT TGTG GGA    |
| MTCO1_6          | GACGTAGACACACGAGCATATTTCA     | AGGACATAGTGGAAGTGAGCTACA/       |
| mtDNA            | cga aag gac aag aga aat aag g | ctg taa agt ttt aag ttt tat gcg |
| NDUFA1           | TGGGCGTGTGCTTGTGAT            | CCCGTTAGTGAACCTGTGGATGT         |
| NDUFA11          | CAATCCTCCGGGCACCTT            | TGCAGTGAACGTGTATTGTCCAA         |
| NDUFA12          | GGCATCGTTGGCTTACAGT           | TTACGAGCAGTAAGTGGTTTTGTTG       |
| NDUFA13          | CGCGCTGTTGCCACTGTTA           | CCCGAAGCATCTGCAAGGT             |
| NDUFA3           | CAAGGCCACGCCCTACAAC           | TCGGGCATGTTCCCATCAT             |
| NDUFA4           | ATGCTCCGCCAGATCATCG           | GCAAGAGATACAGTGTGCTCCA          |
| NDUFA7           | CTGTGCCCCCTTCCATCAT           | TCTGCTGGCTTGCCTGACA             |
| NDUFA8           | CTCCTTGTTGGGCTTATCACA         | GCCCACTCTAGAGGAGCTGA            |
| NDUFAF2          | TGGGTTGGTCTCAGGATTTGTT        | TGCTCCTTCACTTCCCTTGACA          |

|          |                               |                               |
|----------|-------------------------------|-------------------------------|
| NDUFAF4  | TTATGAGGAGATGGGAGCACTAGTG     | CCGCTCGGTTCTCTAGGTTGA         |
| NDUFB11  | TCCTTGGCAGCACCTTTGTG          | CGGCGGGACCACTCTTTC            |
| NDUFB3   | GCTGGCTGCAAAAGGGCTA           | CTCCTACAGCTACCACAAATGC        |
| NDUFB7   | ATGTGATGCGCATGAAGGAGTT        | CTTCTCCCGCCGCTTCTT            |
| NDUFC1   | GGCCCTTCAGTGCGATCA            | CCAGTCAGGTTTGGCATTGC          |
| NDUFS3   | GCTGACGCCCATTTGAGTCTG         | GGAACCTTTGGGCCAACTCC          |
| NDUFS8   | GGCTGAGCCAAGAGCTGATG          | GATGCACTTGGTCATGTTCGATGT      |
| PDK1     | CCAAGACCTCGTGTTGAGACC         | AATACAGCTTCAGGTCTCCTTGG       |
| PDP2     | ACCACCTCCGTGTCTATTGG          | CCAGCGAGATGTCAGAATCC          |
| PGC1a    | CTGCTAGCAAGTTTGCCTCA          | AGTGGTGCAGTGACCAATCA          |
| POLGA    | CAC ACC TAA ACT CAT GGC AC    | GTC CAC GTC GTT GTA AGG TC    |
| POLGB    | GTT TGC CAT GAG TCC ATC TAA C | CTC TGT CAG CTG GAA AGA ATC   |
| SDHB     | AAGCATCCAATACCATGGGG          | TCTATCGATGGGACCCAGAC          |
| SOD2     | TAGGGCTGAGGTTTGTCCAG          | GGAGAAGTACCAGGAGGCGT          |
| TFAM     | CCATCTACCGACCGGATGTTA         | CAGACCTTCCCAGGGCACTCA         |
| TFB1M    | ATGGCTCAGTACCTCTGCAATG        | TGGGCTGTATCAAGGGAGTGA         |
| TFB2M    | ATCCCGGAAATCCAGACTTGT         | GACCAAGGCTCCATGTGCA           |
| TWINKLE  | GCA CAA GTC CAT CGT ATC TTT C | CAT ACT CAC TGA TGA ATG TCG T |
| UCRC     | GTGGGCGTCATGTTCTTCGA          | ACAGCTTCCCCTCGTTGATGT         |
| UQCRB    | ACTGGGGTTAATGCGAGATG          | GTCCAGTGCCCTCTTAATGC          |
| β-GLOBIN | caa ctt cat cca cgt tca cc    | gaa gag cca agg aca ggt ac    |
